# Supplementary material for: PolyMorphPredict: A Universal Web-Tool for Rapid Polymorphic Microsatellite Marker Discovery From Whole Genome and Transcriptome Data
Source: Front Plant Sci. 2019 Jan 11;9:1966. doi: 10.3389/fpls.2018.01966 (PMC6337687; doi:10.3389/fpls.2018.01966)
Supplement: Table S2 — List of 36 HvSSR loci subjected to e-PCR. [file Table_2.XLSX]

## Sheet: Sugarbeet
Sl. No.	Chromosome No.	Repeats	Forward Primer	Reverse Primer	Genotype Product Size
					KWS2320 (Reference)	DH1440	STR06A6001	SynMono	SynTilling
1	chr1	(GTT)8	TGAAATTCGCGAGATGATGA	TGTGTTTGGAAGGAAGGAGG	239	221	201	241	267
2	chr1	(ATG)10	CCACCTTCTGGTTAGGGACA	AGTTGCAAACAGGGAGGAGA	227	291	224	221	220
3	chr1	(AG)8	AGGTTTGGGTGGTATTTCCC	CCAATCAGATGCTCCCAAAT	208	219	183	222	213
4	chr1	(TA)19	CCATACCCTGTGTAATCCCG	GATTCCTCAAGCCCATTTGA	275	265	193	180	169
5	chr1	(AG)8	CGGCAGCAAATACAACCATA	AACCTCTGAACCTTCCTCCG	275	272	215	236	275
6	chr1	(TAGTT)35	CCAGTCTTTGTGGTAGGATGAG	CTCCGTCACTAGCTAGCTTCAA	280	160	140	280	269
7	chr1	(AG)12	TATGGCGAAGGCGTTATTTC	ATGAATAAGGACGCGACGAC	252	222	243	252	238
8	chr1	(TC)8	TAACAGCTTTTTAGGCGGGA	CCATGTAATCAAGGTTTGAGCA	237	223	213	230	237
9	chr1	(CA)9	AGAGTCGTTTTACGCAGTTGA	TAACTCCTGGTCGGGTCATC	229	263	257	227	229
10	chr1	(TC)8	CCAATCAGATGCTCCCAAAT	AGGTTTGGGTGGTATTTCCC	225	225	221	202	223
11	chr1	(GAA)31	GGTTAATGGAAGGTCGGACA	TTTGAGGTTCCACATGACCA	261	261	304	213	222
12	chr1	(AAT)17	AAATGACTCAATTTTACGATTCAAAA	GCCATTGGATCAACAAGGTT	267	261	260	267	217
13	chr1	(TA)15	ACGGGTTAATGGGTGACAGA	GCATAAATGCTCACCCGAAT	197	216	316	210	197
14	chr1	(GA)12	CGCTGATTTCATCAAGGGAT	CACTGACCCCCTCACAACTT	182	172	174	170	182
15	chr1	(CAT)9	ATTCCTTGGCAGCTCAGAGA	CGCTGCTTGTGCTTACTACG	160	154	156	160	151
16	chr1	(TA)13	CATTGGTTGCTTGCTTGAGA	TTCGGCAGAGTCTCCTTTGT	139	141	116	120	139
17	chr1	(AT)10	GCCAATTCAACTTCGGGTAA	CCTTATATTTATCGCACACACACA	148	129	139	148	125
18	chr1	(TAT)21	GCCTACTGACGTTCAATTCCC	CAAAAATACAAAAATTAGCGAAAGC	275	273	215	215	240
19	chr1	(AT)19	TTAACCTTGGACGTTCTGCC	CCAAGGCGAAACTCAGAAAA	248	225	232	222	222
20	chr1	(AG)8	CTCTGGAGGTTTGGGTGGTA	GCTCCCAAATTAGGGTGACA	218	213	215	196	215
21	chr1	(TA)13	TGACGGATTCGGGTGATAAT	GCCCAACAACATAAAACCCA	146	120	121	123	120
22	chr1	(ATA)9	CTCAGCAAGTTCAGGCCATT	GTTTTGCTTGTCGGTCCATT	262	252	254	252	262
23	chr1	(GA)8	GCGCACAAAGGAGAAGAGAG	GAATCGAAAGCCCAAAAGTG	257	257	219	259	259
24	chr1	(AT)7	CGCACGCAATACTCTACCAC	CACCCCGAAATTTCTCTGAA	279	266	266	279	257
25	chr1	(AG)12	AAGCGCTTCAGAGAGTTTGG	TGCTAATTACCATCTGCCCC	258	253	258	253	255
26	chr1	(CT)11	TGGTCGCCTTCATTCATACA	TACATTCACCATGGCCTCCT	255	253	251	255	253
27	chr1	(AT)9	CACATTACACACTCGGCACA	TTCTCTGAAATTTTCGCGTG	250	247	244	247	250
28	chr1	(ATA)18	AGTGGTGGGTGGTTGATGTT	CCGTATTCCACATTTAAGCCA	278	238	241	278	241
29	chr1	(ATG)8	CACCTTCTGGTTAGGGACGA	GTTGCAAACAGGGAGGAGAG	222	222	191	225	225
30	chr1	(AAC)10	CCACCACAAACTCATCAACG	AAAAATGCCATGGTTTGGAA	197	194	197	203	203
31	chr1	(AT)6	AACCATCCTTAAAACATATAAAACG	TAAACAATTTCGGTCATCATGT	194	195	148	194	195
32	chr1	(CTGAGC)13	TTGTCAGATGAGCAACCTGC	CTTGCCTGAGCTTTACCCAC	207	177	207	183	183
33	chr1	(TA)13	CCGTAGGGTATGGGTAGGGT	AGCCGCACTCTCACAGTTTT	263	234	263	263	305
34	chr1	(TA)22	CATTCTCATCGAATCCCGAC	ACACTTGAGAAAAGCGGGAA	238	171	238	238	296
35	chr1	(ATT)15	CATGGGAAGTGTCGCCTAAT	AACCTCCCACCCACCTAAAC	274	274	274	284	281
36	chr1	(AT)25	TGAAGTGTGCCTTTGTCTTTT	TGCTTGAAAAGTTAGTTGATTTATGA	280	222	280	250	280
37	chr1	(AAT)36	GCCTCAACAACAGTGATAATAGTC	CGATGTACGATATGACAACGA	280	226	280	172	280
38	chr1	(CCA)8	TGCTTCGTTAGTGGCATTTG	TATTGCCACCATTATCGCTG	279	282	263	279	279
39	chr1	(AAT)17	ATATTTTGGGACGGAGGGAG	TGGGTGCTTAGATGTTGTCG	275	269	275	128	275
40	chr1	(TA)11	ATGGGAGTCGATTCTAGCGA	GTTTTCCAGCCCAAGATGAA	239	265	239	239	269
41	chr1	(CT)14	AATGCTCAGGGTGCCTACAT	AGTCCCAAAACGGGGACTAT	178	178	222	178	266
42	chr1	(AT)34	ATGTGGCGCTGTTTCTTGAT	TCAAAACACACCCCTAAGACAA	265	174	160	265	265
43	chr1	(TA)9	AGTTGTGTCGGTGGTCTCGT	TCACTTGGTTCGGTCTCCTC	263	279	256	263	263
44	chr1	(GT)9	GCAATTAACTGAGCTGCTTGG	GCATTAGGGGCAGTTAACGA	262	262	235	276	262
45	chr1	(AT)9	AACCGGAATTGCTTATTCAAAA	ATCCTGACAATGGTGGAAGC	258	258	252	256	258
46	chr1	(GT)8	GACATCATCCCCCATCAGTC	CCTGCCCTAAAAATCCCACT	246	242	208	246	246
47	chr1	(TG)10	GAGAGCCAATTCACACAAAGG	ACCCAAGCGTTTCAGGTAGA	244	244	229	270	244
48	chr1	(AT)8	GTGGGTCCTTACTGGGTCCT	TGAGTTTTGATTTTGTGAACTCG	242	237	242	242	236
49	chr1	(AT)8	AAAAGAAATTGAGTTTGACTATGCAAT	AAACCCGACTTTTGCTTCCT	230	224	193	230	230
50	chr1	(TG)11	CATATCGGAGTGGCGAAGAT	CTCATCAAGGCCATGGAAAT	228	225	224	228	228
51	chr1	(AT)20	TGAAAGTCATGCCCACAATC	CCATCATCCTGTCATTGCTG	205	171	195	205	205
52	chr1	(AG)8	AACCTTCGGTGTAACATGCAC	TTTCAAAAACCAATCAAACTAAAAA	209	209	203	209	204
53	chr1	(TA)19	TTTCCCTCCTTTTCACATGG	TGAAGTTATCCTAAAACAGGCAAA	201	280	201	199	201
54	chr1	(CT)8	TTCCTCCTCTCTTTCCTCTCC	CAACAAGGAGAACGACCCAT	201	201	155	194	201
55	chr1	(TA)9	TGCTTAGAAACTGCGTGCAT	CCTATATATGTCATAGGGCGGA	180	180	140	180	182
56	chr1	(AGA)36	TGAAGGGAATCCGATTGAAG	CCATGTCAGCTTCATCCTCA	182	182	128	119	182
57	chr1	(CT)11	TTTTATTTCACGAGGCCCAC	TGGTGTTGAGCTGCTACTGC	167	147	167	167	171
58	chr1	(ATC)15	GTGTTGCTTTTTGTCCAACG	ATTCTTGCCTTCACTGGACC	250	247	221	221	247
59	chr1	(AT)8	CACATTGCGCATATAACCAG	CTTGCATGCCGATTAGTGAG	209	203	203	203	207
60	chr1	(AT)13	ATTGCGGAACAACTAAACGG	GGAAAACCCAAAAGGGAAAA	280	280	273	273	280
61	chr1	(TTG)8	CGTCATCCTCTTTCCATCGT	TTCCCAAACCAGAAACCAAA	277	277	263	263	277
62	chr1	(CT)6	TGAATCTGATAAATGTATAACTCCTGA	CATTGTGGAGTGGGTCTGTG	274	276	274	274	276
63	chr1	(TTG)6	CCTGCAACTCTTGTTGACCA	CTTCACATCCATGGAAACCC	272	269	272	269	272
64	chr1	(CA)10	TTCAATATGGTCCAGGAGGC	AAATTGCATGTCGAAGGAGG	271	269	269	271	271
65	chr1	(CT)8	TTCGAATTTGGGGACTTTTG	AATTAAGCCATCTGCGAACG	258	256	258	258	256
66	chr1	(AC)10	AGTCCCACAAAGCATGAAGG	CAAATTTGCGTCGCTCACTA	247	247	247	255	255
67	chr1	(ATA)15	TACACTTTAACCACGCCGGA	GCATGTGTTCCCAAAACTGA	271	248	271	271	248
68	chr1	(AT)10	CCCCTCCTTCTAGTGTTCCC	TCAACATTGGGTTGTTGGAA	248	269	248	269	248
69	chr1	(GA)8	GGTGCAGCAACTTCTGACAA	AATCCCATCCCACTACCCTC	248	238	248	238	248
70	chr1	(CT)6	TCCCACTCTGACACTCTCCC	CCATCGGTGAAAATGAGCTT	247	247	245	245	247
71	chr1	(AT)13	CGGAACGGAATGTGGTAATC	AGACGTGAAAGTTTGTGGGG	243	241	241	243	243
72	chr1	(AG)8	GGGAAAGTTAAGAGGAGGCG	ACAGTGTTTTGCCCCAGATT	242	240	240	242	242
73	chr1	(AG)8	GTGCTGGAAACTGCACAAGA	CCCTACACGTGTCGAAGGAT	242	242	238	242	238
74	chr1	(TTAG)6	GTGCGTGCCTTTCTGTGTAA	CCTTCACTAATTGAAACATTCCC	224	224	224	220	220
75	chr1	(AT)9	GCCTAAAACATTCTTGCGGA	CTCTATCCCCATTTCCCACC	214	214	214	213	213
76	chr1	(AT)14	GCTGTGAAGGCAAGAAAAGG	GATTTTTGGTGGTCTGGGTG	210	202	210	210	202
77	chr1	(TA)6	CATTGGCTAGATGGCTGGTC	GTCACCCTTCCCCATCCTAT	172	172	168	168	172
78	chr1	(TCT)14	ACCGGAAAACAAAATCCTCC	TTTTGAATAACTCCGCCCAC	172	172	139	139	172
79	chr1	(AT)10	TGATGGTGGAAAGAGGGTTT	CTTCCTCCCCATCCATGATA	156	156	156	151	151
80	chr1	(CATGAC)5	CAAGTGTTCAACCATGGCAC	AAATATTTGCTCCAAGGCCC	151	145	151	145	151
81	chr1	(TC)9	TCCTCGGGACTAAGGCACTA	GAGGAATGCCACAGTAACCAA	115	117	115	115	117
82	chr1	(TC)9	GCCACGTGAGTCTTGAATGA	GCAGATTCCAAACTTTTGCC	269	269	269	269	279
83	chr1	(AT)10	ACCGATTTACAATCGCATCA	TTGTGAATTGGGATTGTTGTG	276	276	276	276	272
84	chr1	(AT)9	TCGTTCAAAAAGAAAGATAGAGAGAA	AAAAGAAGAAGACCGACGCC	272	272	272	272	270
85	chr1	(TA)13	AAAATAAGGATTGAAGGTTGACAT	TTCTGCGAAAAGTTCTGGCT	273	273	273	273	269
86	chr1	(AT)21	TTGGCAAGGGGATTTATGAG	TTAAGGGTTGTTTTCAGCGG	278	278	278	278	264
87	chr1	(TC)8	TCCTCCTCAACCGCATAATC	TGTGAGATTGAATTGGGGGT	252	252	252	252	256
88	chr1	(AT)14	AGCAGCACAATCTCAGACCTC	AGGCTGGTGCTTAGTCGATG	245	245	245	245	252
89	chr1	(GA)8	CACCAACGCACAAGAAGAGA	GTTCTTTTGCTCGACGAACC	175	175	175	175	234
90	chr1	(AG)6	TGGTGTTGTATTAAGGCCCTC	TGAGCAAAAAGGCTGGTTTT	220	220	220	220	222
91	chr1	(TA)9	TGCATTAATGTTGGGTCTATGC	TCCTTGATGTGGGAAGATGA	223	223	223	223	218
92	chr1	(GA)8	AAGATTAATGTATGCGGCGG	TATAAATACGCCTCGTCGGC	215	215	215	215	217
93	chr1	(GT)16	GCTTGATAGATATGAATTTTGGGAA	AAGCACCAAAAATTGCCGTA	207	207	207	207	209
94	chr1	(CTCA)18	ACGCAGCCCTTCACTTTAGA	TGGTTGAATTAGGGCTCTGG	232	232	232	232	208
95	chr1	(CA)16	GGTGCCTACAACGACTGACC	TCAGTGCTTCCAACCTCCTT	202	202	202	202	204
96	chr1	(GA)12	CCCTGAATTGTGTTTGCTGA	CCCACTCTATGATTGCCTTAGC	195	195	195	195	191
97	chr1	(TAT)9	GCAAATGAGGGAAAAATATCCT	TTGAAAATAGAGGGAGTGCTGA	268	268	268	268	186
98	chr1	(AT)10	TCAGTTGAATCCAATCAGGGA	GAAACAAAGGGAGTATGAGTTATCA	237	237	237	237	186
99	chr1	(GA)9	GGAGATGCGAGAGAGTGAGG	CGGCCCAATTAGGGTTTTAT	187	187	187	187	186
100	chr1	(CT)11	TCGCGAAATGAATCTTGTCA	GAGAAGGGACATGGAAACCA	187	187	187	187	182
101	chr1	(AGA)5	ACCCCCAATTCAATCTCACA	CCATGAAAATGGACCTGCTT	178	178	178	178	181
102	chr1	(AT)20	GCATGACACGTGACAAAACA	GTTGGAAGCTAGCCATGACA	241	241	241	241	177
103	chr1	(TA)8	TTTTTCTTCACCCCATCCAC	CAGACCATGTCACTCGTGCT	169	169	169	169	175
104	chr1	(AT)9	GATCTTCATTCAGACGGGGA	CCCGATACACTCGTGCTTCT	176	176	176	176	167
105	chr1	(TC)8	CAGAAACCGCAGCAATATCA	GAGAGAGAGAACTCCGTGCG	168	168	168	168	159
106	chr1	(TA)15	AATTAGGGGGTTGTTTTGGC	GTGGAAGTTTCGTCAAGGGA	195	195	195	195	157
107	chr1	(GA)17	CATGCCATGAGAATAGGTCA	CCCAACATCAAAGTCAAGCA	163	163	163	163	156
108	chr1	(TA)8	TTATCAACCTGAACTCCCGC	TGAGCGATCCATCAACATTT	280	280	280	280	154
109	chr1	(ATA)15	AGCTTTGACAGAAGTGCATCC	TGGGATGGAGGGAGTAAATG	193	193	193	193	141
110	chr1	(TC)6	ACCATTTTCATTTTCCCGGT	TCGGGACCCACAACTGTATT	116	116	116	116	118
111	chr1	(TA)12	CACCCCGAAATTTCTCTGAA	TATACACTCGGCACACGCA	275	262	262	261	262
112	chr1	(TA)10	CGAGCTTTTTGTCCCAGGTA	CGTCTATCAAACAATGCCACA	267	267	264	264	264
113	chr1	(AT)8	TGAAATTTTTGACCCAACCC	ATCGATCATCTGGAAGTGGC	248	247	247	248	247
114	chr1	(CT)12	CATGTCATGAATTGAAGCCG	GTGATCGCAAGCTTTGTTGA	249	249	247	247	247
115	chr1	(TA)11	GATGGGAGGCAATGAGTGTT	ATCCGCCACTACAAACTTGG	236	235	235	236	235
116	chr1	(TA)8	TAGAACCGTTTGGATGGTGC	AGCCCTTGGGCTGACTTAAT	207	217	207	217	217
117	chr1	(ACTGA)8	TTAGGGCATGTTCTCTTCGG	TCGTTTCGTACCTTTGAGGC	280	280	280	291	280
118	chr1	(ACA)10	CTCCAAGCGTTCGTTTGATT	GCATTCATCTGGTCATCCCT	280	298	280	280	280
119	chr1	(AT)8	TCACTTTTTGCCATCTCATGT	TTGCTTGTTGGAATGTTTTGA	280	282	280	280	280
120	chr1	(AT)8	CCACTTCCATCCATGAACCT	GTGAGCATAATCCCCCGTAA	280	280	242	280	280
121	chr1	(AG)14	TGGAATCTAACCATGTGCCA	CATCACTCTTCCTTTTCCAGG	280	274	280	280	280
122	chr1	(TTA)32	TTTTGAGGGGAGCCAAATTA	AGCGTCAAGCACTCCTCATA	280	226	280	280	280
123	chr1	(AT)8	CGTCTGCTGATCGTTTATGG	CCTTATTTTCTAGCAAGCGGA	280	280	280	161	280
124	chr1	(ATTAT)23	TTCCATGAAACGAAGATGGA	GGGTGGGAAAACCAATGTAA	279	224	279	279	279
125	chr1	(AAT)15	GACGATCAATTTCATGGTTTATT	TCCCCCTTGACTTATATAATAGAGATT	279	279	279	185	279
126	chr1	(ATAAG)15	TTCCGTTTAAGGGTGTTTTCA	CGATCCGTTTGATTCAACTT	277	277	277	303	277
127	chr1	(CA)8	AATCGGTGAACAACTCGGAC	CTTTTTGGGTTTGGGGTAGG	277	277	268	277	277
128	chr1	(ATC)52	TTTGAGATGTCGAATGTGAATTA	TTGGCCAAATACCGATCAAT	276	276	156	276	276
129	chr1	(AT)9	GAGCCTTTCGGTTTTTGTTG	GGCTTCCAGAAGATGCAAAG	276	272	276	276	276
130	chr1	(AT)24	GCTTGGACTTGTTTGATCTGC	TTGACAGTTGAGGAGAATTTCG	275	247	275	275	275
131	chr1	(TA)14	ATCGCAACGTTACAAAGGCT	TGCCGAGTGTAAAATGTGGT	274	299	274	274	274
132	chr1	(GA)9	CACACTTGCCAATAATCCCA	GTATTTTGCTCTCCTGCCCA	274	272	274	274	274
133	chr1	(TC)22	TTCATCATCAAAAATAACGACACA	GCGTGATGCCTTGAGAGAAT	273	273	247	273	273
134	chr1	(AT)8	TGAAACATGCATCCTTGTGC	CAAGGGATGGATGAATTTGG	273	273	238	273	273
135	chr1	(AT)22	CCCAAAATATTTGATCCTCCAA	GGGGTAGGGTGGGAGAAATA	273	273	233	273	273
136	chr1	(CT)6	GGGCTGTTGATTTTGATCGT	AGAAATCAGAAGGAGGCCGT	273	272	273	273	273
137	chr1	(TC)10	AAAAATCTGATGCCGTTTGG	AGAGCACCGACGAAGTAGGA	271	271	236	271	271
138	chr1	(TA)9	TCTAACTAGAACCGGTTTCTTTAAAAT	TCCCACTTTAGGTAAATTTTGTTCA	271	270	271	271	271
139	chr1	(TG)6	GCATCGGTCCATTCGTTATT	AGAGTGGTTTTACGCATTTGA	270	270	230	270	270
140	chr1	(TA)8	GAGTCGAGTCGAGCAAGTCA	TCGAACTCGAACTCGTTTCA	270	253	270	270	270
141	chr1	(TA)11	GGGAGCAAAAGCCATCAATA	CTGGATTTCAGCGGATCCTA	267	269	267	267	267
142	chr1	(TC)8	TCCTTCAATGGCTCCTGATT	CTCACATTGCAGTCGGAAGA	267	267	267	266	267
143	chr1	(AT)23	TGCTTTCTGTTTTCAAGGGG	TTGATGGGTACATGCCAGAA	266	266	240	266	266
144	chr1	(AG)10	TTGTAAAGCATGACTTGCCCT	TGGTTGTCAACATAATGGGC	266	266	227	266	266
145	chr1	(TC)11	CCCATTAACCTGCGTGTTTT	TGGAACACGAAATGGAGTGA	265	263	265	265	265
146	chr1	(CT)8	ACTCGTCGGAAAACATGACC	AAAAAGAAGAGGGGCGAGAG	264	264	262	264	264
147	chr1	(AAT)10	TTCTCATTAGGAACACCGGG	ATGGTGATGATGGTGGACCT	264	264	264	191	264
148	chr1	(TTG)14	AGATCATCTCTCGCATCGCT	CCGCAACATTTTAATGCTCA	262	262	262	256	262
149	chr1	(AG)10	CTTTTCTGAGCTCCCTCCCT	CTTTGAGTCGGGCACAGATT	261	261	257	261	261
150	chr1	(GT)12	CAAAAATGACGTGGATGGTG	AATCATAGACCCCCACTCCC	261	251	261	261	261
151	chr1	(AT)12	TGGATTTTATGAGGGGAAGG	GTTGCCCTAAAACAGGCAAA	260	260	258	260	260
152	chr1	(TA)10	GGAGAGATTGTAACACCCCAA	CAGACACGGGCACTACATTG	259	144	259	259	259
153	chr1	(TAT)11	CACCATTCGAACTCCCTAGC	GCTTTGACCACAAATTCCCA	258	258	241	258	258
154	chr1	(AAT)57	ACCGCTCAACTAATTGCACA	TGAAATATATTGACGTGTTGGTTATG	258	258	123	258	258
155	chr1	(CT)12	ACATTAAGGGCCTTTTGGCT	GACGTCCGATTGATGCTTTT	255	247	255	255	255
156	chr1	(AT)21	TCCATATCACATAAGCCGGTC	TTTGTACGATGCCAGTTTGG	254	222	254	254	254
157	chr1	(TAA)8	AAGCTTATGCTTCCTCCACG	CCCTCGACGTTAAATGTTGTT	251	251	245	251	251
158	chr1	(AT)36	TTCTCCCCATTTGAGATGCT	TTGAGCGTCTCTCCTCCTTC	251	251	251	162	251
159	chr1	(TTA)15	GAGAAAGCACCTACAAGCGG	GCTTTTTCTCTCTCCCCCAC	247	247	228	247	247
160	chr1	(ATG)11	GCATTCCCCTTCGAAGTATG	TTGCCAAGAACCGTCTTTCT	247	247	225	247	247
161	chr1	(TA)8	ATGAAGATTTGCAAGTGGGG	ATTCCACGGTTATTGCAGGA	246	246	222	246	246
162	chr1	(TA)9	TGCTTTTTGTTTGTGCTTTTT	CATGTTCAGATTTGTGCCAAG	246	244	246	246	246
163	chr1	(TA)8	TGCGAATGAATCTTAACCACA	AAAGAGCATTCTCATGTGATCTTG	243	241	243	243	243
164	chr1	(TC)13	ACGGGAAGATATGGTCGTTG	CCATGAAGGCAAGTCTTGGT	242	249	242	242	242
165	chr1	(TA)12	TTGGAAGTTCATGTAATCCCCT	TGCGATTTTACCCAGAAACC	242	133	242	242	242
166	chr1	(AT)11	AGTATCCAATGTGCAGGCAA	TGCATACTAGGGACTTTGGTGTT	241	241	241	181	241
167	chr1	(AC)18	GGCTCATAAAATCATTTGGCA	TGTCCAATCTATCGGCGAGT	240	240	224	240	240
168	chr1	(TGA)9	GCTGGATTGTTTAAGTTGGTCC	CCTGCTGCTTCTTTGTCTCC	239	236	239	239	239
169	chr1	(ATT)9	ATGACGATGGACGATGTACG	TCCGTTATCACAAGTTCTTACCAA	238	244	238	238	238
170	chr1	(CA)26	CTCAAACACCGCTCAAGTCA	CTCTGTCTCCTTCCTCACCG	237	237	237	267	237
171	chr1	(TA)19	GCGACCCTTTTGTATGTGGT	TGAAGTTATCCTAAAACAGGCAA	237	314	237	237	237
172	chr1	(ATA)9	TGGCTTCCCTCACTAAGCTC	ATTGTTTGTGCTTTGAGGGC	234	234	225	234	234
173	chr1	(TCC)9	CCTCCATGGAAGAAAAGAGG	TCTTTCCCTTAACACACGCA	234	231	234	234	234
174	chr1	(TC)8	TCTAGTTGCTGGTGGTGTCG	CGCCAATGTCAAAATCAACA	234	230	234	234	234
175	chr1	(AG)10	GTTTGGGTGGTATTTCCCCT	TTAGCCAATCAAATGCTCCC	231	231	231	203	231
176	chr1	(AG)9	TAGAATTAGGGGAGGGGGTG	GCCACATCATGAACCTTGTG	230	230	228	230	230
177	chr1	(TA)10	AGTGTTCCTACGCAGCCTGT	CAACGAGAATGAAACTGCCA	226	223	226	226	226
178	chr1	(TG)9	CGGAGGGTCTCCTAACCTTC	CCAAGTTATGCTTCCGTTCC	220	220	192	220	220
179	chr1	(AGGGTT)10	GGGAAGGGTAGAGGGAGTTG	CGACGTCAGTTTCCGTTAGTC	214	214	208	214	214
180	chr1	(TTG)15	CCAGATGGAACAACACCCTC	CACAAGTATCGTAATTTTGGGG	213	213	207	213	213
181	chr1	(AG)11	CACAACTTGGGGTTACCATTG	TCTTAAACCGGATCGAGTGG	213	213	189	213	213
182	chr1	(GA)11	GTCAAGGTCGGAGAGAGCAG	ATTCCGCACTGGGTAAACAC	209	190	209	209	209
183	chr1	(GA)11	GATCGAGAACTGGGAACTGG	CAAACGATGCCTCTCTCTCC	208	208	204	208	208
184	chr1	(TA)14	GAATCCATCCATCCATCACC	AATTTTTCATCCATCACCCG	208	190	208	208	208
185	chr1	(AAGA)8	CCGACATGGTTACCCCACT	CCTCGAAAAGAAATGTGCAA	198	202	198	198	198
186	chr1	(AG)8	ACTACCACCAAAATCGCCAG	GTTTAAGATGGCGGAACGAA	196	196	295	196	196
187	chr1	(AT)9	ACCGTTCCTCATTTACGCAC	TGACATGTTTTTGCTTTGGG	195	152	195	195	195
188	chr1	(TA)7	TATAAGTCAAGGGGGACCCA	AACCATTTTTCTCATTATATCAAGGTA	195	195	195	194	195
189	chr1	(CA)8	CTTCGGGTGGAAAAGCATAC	AGGACCAACTGTGGAGCAAA	194	194	156	194	194
190	chr1	(TA)16	CAATGGCCCTCTTCCTACAA	GCCATTAAGGTGCTGCATTT	189	189	179	189	189
191	chr1	(TA)8	TGAAATGGCCTTTACTTGCAG	TGACTCCTCCCTTGGAGTGT	188	186	188	188	188
192	chr1	(CA)9	AGATTCAACACTCCCATCCG	TGAATCACAAGGCAAAATGG	185	185	163	185	185
193	chr1	(TC)9	TTTGGTGGCTTTTTCTTTGC	CTCTACCATAGGCAACCCCA	182	182	162	182	182
194	chr1	(TA)10	GTAATTGGTTGGAGCTTGCC	TGGTGCACACTTATGCAAGG	180	180	180	194	180
195	chr1	(CT)9	TTGCTGGTCACTTGAGTTCG	TGGCACTGTTGGTGGTACAT	180	180	179	180	180
196	chr1	(CA)8	TGCAGGATTTACTGTGGACG	TCAGAGAGGTCCCCCTTTTT	167	167	165	167	167
197	chr1	(CAG)11	TCCTTCACAGCATCAGCAAC	CCAAAGCCAGGAAAGTTGAA	162	156	162	162	162
198	chr1	(TA)12	ATCGGAAGTTGGAGTGGTTG	TTGTTCTCCAAGCAAAACCC	160	158	160	160	160
199	chr1	(TA)10	TGGGCTAGATTTTATTGGGC	TTTGTGGTCATTTCAAGCGA	157	174	157	157	157
200	chr1	(TGG)8	AAGGTGGAACGAAGGTGATG	TCTCTCTCCTCCATCCTCCA	156	156	136	156	156
201	chr1	(TA)11	TTGGAATTTGTTTGAGCCGT	CAAGCAAATCCCCAGCTATT	154	154	169	154	154
202	chr1	(AC)7	CCACTCGATCCGGTTTAAGA	TGCTGAAACCCCAACAAAAT	154	154	152	154	154
203	chr1	(TA)9	CCTTATCCATGGACCACACC	ACGATCAAAATCAACAGCCC	150	124	150	150	150
204	chr1	(AT)23	GCTTCCCAAAGCACAACTTT	TCTTCCATTGCATACCCCTC	274	266	274	274	274
205	chr1	(ATT)8	CCTAATTTATTAACGTGCCATTG	TCCTCCCCTCACAACACTTC	238	230	238	238	238
206	chr1	(TTA)8	GGGGTTAATTAAGCTGCTACG	TCTCCTTTCCATCCCATCTTT	278	269	278	278	278
207	chr1	(TTCAG)8	CTCTTAGGGCCTGTTCTCCC	GAATGGAGCTGAACTGAACTGA	147	147	132	147	147
208	chr1	(TA)9	TCTGGGTCATATTGGAGTTGC	TGCAGATTTCATGACACCAAG	130	130	113	130	130
209	chr1	(TA)12	TCTTTGTTTAGGCGTGGCTT	GGAGATGCACACAAACCTCA	201	201	201	181	201
210	chr1	(TA)29	AGGGAAGGTCTTCCAATCAA	CCCCCACCTCTGTTTCTTCT	271	235	271	271	271
